# Supplementary material for: Preliminary Expression Analysis of the OSCA Gene Family in Maize and Their Involvement in Temperature Stress
Source: MDPI journal article supplement (doi:10.3390/ijms232113658), 2022-11-07
Supplement: s1 [file s1]

**Table S1. Sequences of oligonucleotide primers for qRT-PCR.** F: forward; R: reverse.

| Oligos                               | Primer Sequence(5'-3') |
|--------------------------------------|------------------------|
| <i>GADPH-F</i>                       | ATGGCAAGCTCACTGGTATG   |
| <i>GADPH-R</i>                       | CCAAGGAAGTCGGTAGAAAC   |
| <i>Zm00001d000077-F(ZmOSCA1.1-F)</i> | TTCTTGGTTGTTTTGGTA     |
| <i>Zm00001d000077-R(ZmOSCA1.1-R)</i> | AACTCACTTCACTTTCTAT    |
| <i>Zm00001d044555-F(ZmOSCA1.2-F)</i> | TGTCTCCCTTACAGTTCG     |
| <i>Zm00001d044555-R(ZmOSCA1.2-R)</i> | TGCCTTCTCAATCCCT       |
| <i>Zm00001d009771-F(ZmOSCA1.3-F)</i> | AGCCAGGCAAGTGAC        |
| <i>Zm00001d009771-R(ZmOSCA1.3-R)</i> | CTGTGGAATGGAGGG        |
| <i>Zm00001d038240-F(ZmOSCA1.4-F)</i> | TACATCAGTCCGCAAATAA    |
| <i>Zm00001d038240-R(ZmOSCA1.4-R)</i> | TACCAGACCAGCCATCA      |
| <i>Zm00001d030133-F(ZmOSCA1.5-F)</i> | TCGCTGGAAGGAG          |
| <i>Zm00001d030133-R(ZmOSCA1.5-R)</i> | TAGGAGGCTGGTGG         |
| <i>Zm00001d041229-F(ZmOSCA2.1-F)</i> | TGTAGATGTGCCCTTGATA    |
| <i>Zm00001d041229-R(ZmOSCA2.1-R)</i> | TCTTTAACTGGACTGACCC    |
| <i>Zm00001d033401-F(ZmOSCA2.2-F)</i> | GAGATTTGTCCCTTCCC      |
| <i>Zm00001d033401-R(ZmOSCA2.2-R)</i> | CATCCAACCCAGCAGT       |
| <i>Zm00001d013364-F(ZmOSCA2.3-F)</i> | CAGAGGCAGGACGATTAC     |
| <i>Zm00001d013364-R(ZmOSCA2.3-R)</i> | GAGTCCAAGCCAGCAAC      |
| <i>Zm00001d030860-F(ZmOSCA2.4-F)</i> | GTGAACTTCCTCGGTGAC     |
| <i>Zm00001d030860-R(ZmOSCA2.4-R)</i> | CGTTGGAGATGCTGAATAGA   |
| <i>Zm00001d011872-F(ZmOSCA2.5-F)</i> | GGGGCTTACGGGTGTTA      |
| <i>Zm00001d011872-R(ZmOSCA2.5-R)</i> | ATGCCTCAATGTTTCCTATGT  |
| <i>Zm00001d007865-F(ZmOSCA3.1-F)</i> | TGGGCATTCTGTTGTCA      |
| <i>Zm00001d007865-R(ZmOSCA3.1-R)</i> | ACCGCAAACCTCCTCTGG     |
| <i>Zm00001d048361-F(ZmOSCA4.1-F)</i> | CAAACAAGGCGGTAAAGG     |
| <i>Zm00001d048361-R(ZmOSCA4.1-R)</i> | TGATTGCCAAGGGTGAAC     |
